# Supplementary material for: Nanoporous bimetallic Pt–Au alloy nanocomposites with superior catalytic activity towards electro-oxidation of methanol and formic acid
Source: Royal Society of Chemistry journal article supplement (doi:10.1039/c0nr00830c), 2011-01-01
Supplement: c0nr00830c.pdf [file c0nr00830c.pdf]

Electronic Supplementary Information (ESI):

**Nanoporous bimetallic Pt-Au alloy nanocomposites with superior catalytic activity towards electro-oxidation of methanol and formic acid**

Zhonghua Zhang,<sup>a</sup> Yan Wang<sup>b</sup> and Xiaoguang Wang<sup>a</sup>

<sup>a</sup>Key Laboratory for Liquid-Solid Structural Evolution and Processing of Materials (Ministry of Education), School of Materials Science and Engineering, Shandong University, Jingshi Road 73, Jinan, 250061, P.R. China.

<sup>b</sup>School of Materials Science and Engineering, University of Jinan, Jiwei Road 106, Jinan, 250022, P.R. China

\* Corresponding author. Email: zh\_zhang@sdu.edu.cn; mse\_wangy@ujn.edu.cn

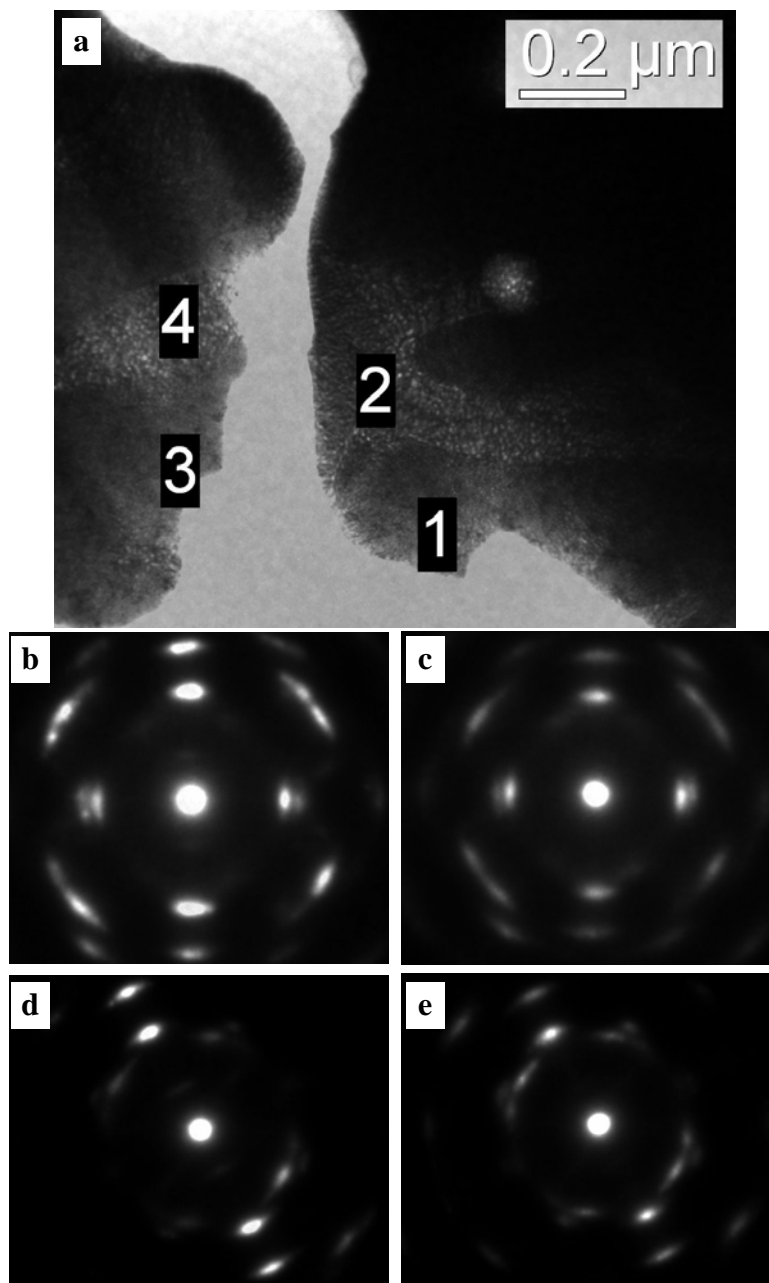

Fig. S1. (a) TEM image showing the microstructure of the np-Pt<sub>60</sub>Au<sub>40</sub> NCs fabricated by dealloying the rapidly solidified Al<sub>75</sub>Pt<sub>15</sub>Au<sub>10</sub> precursor in the 20 wt.% NaOH solution, and (b-d) SAED patterns corresponding to the positions 1-4, respectively.

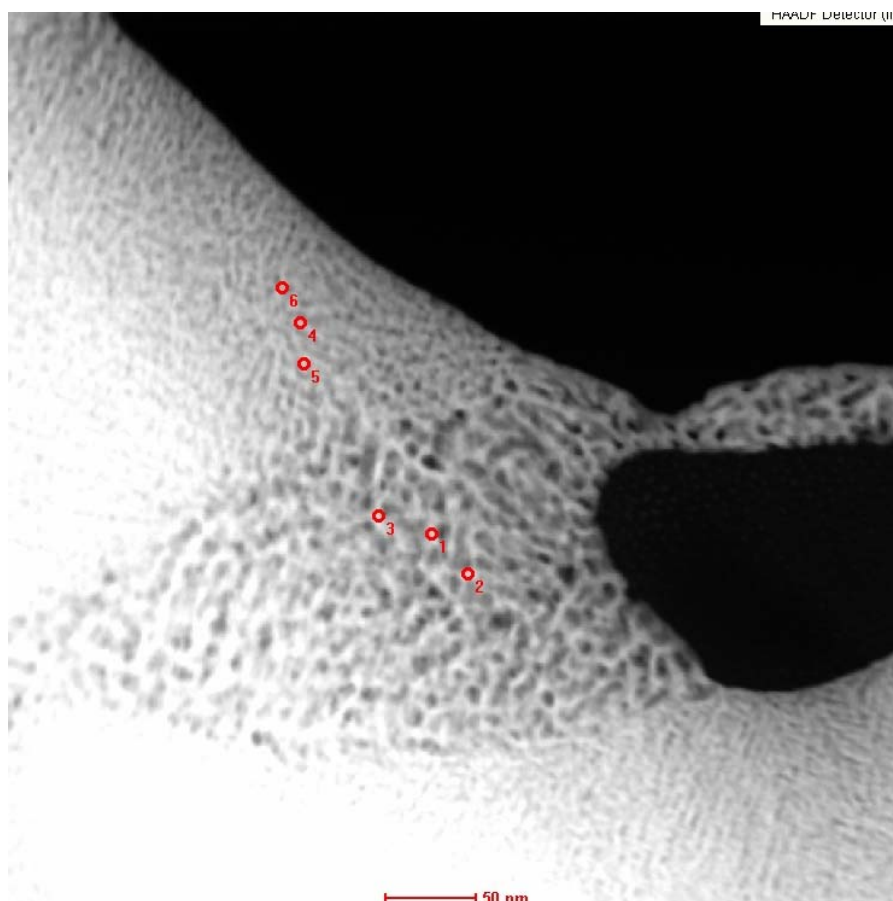

Fig. S2. HAADF-STEM image showing the microstructure of the np-Pt<sub>60</sub>Au<sub>40</sub> NCs fabricated by dealloying the rapidly solidified Al<sub>75</sub>Pt<sub>15</sub>Au<sub>10</sub> precursor in the 20 wt.% NaOH solution. The positions for NB-EDX analysis are highlighted by small circles with the numbers 1-6 beside.
